# Supplementary material for: Development and psychometric testing of Holistic Clinical Assessment Tool (HCAT) for undergraduate nursing students
Source: PubMed Central journal article supplement (PMC5034523; doi:10.1186/s12909-016-0768-0), 2016-09-22
Supplement: 12909_2016_768_MOESM1_ESM.pdf [file 12909_2016_768_MOESM1_ESM.pdf]

Table 2: Internal consistency (Item-to-total correlations and Cronbach's  $\alpha$ ) and Test-retest reliability of the HCAT

| Domains and Assessment items                                                                                                          | Item-Total Correlation<br>(n = 130) | Cronbach's Alpha<br>(n = 130) | Intra-class Correlation Coefficient<br>(n = 30) |
|---------------------------------------------------------------------------------------------------------------------------------------|-------------------------------------|-------------------------------|-------------------------------------------------|
| 1. Professional, legal and ethical nursing practice                                                                                   |                                     | .924                          | .957                                            |
| 1) Complies with Singapore Nursing Board (SNB) Code of Ethics and Professional Conduct, Standards of Practice for nurses and midwives | .716                                |                               |                                                 |
| 2) Practises with reference to institutional/national legislation, policies and procedural guidelines                                 | .697                                |                               |                                                 |
| 3) Demonstrates responsibility and accountability for care within scope of practice and level of competence                           | .750                                |                               |                                                 |
| 4) Complies with professional expectations                                                                                            | .743                                |                               |                                                 |
| 5) Works with Registered Nurse (RN) to apply SNB Code of Ethics and Professional Conduct for ethical decision making                  | .705                                |                               |                                                 |
| 6) Works with RN to discuss care provision with the client and family within a reasonable time frame                                  | .619                                |                               |                                                 |
| 7) Seeks permission from the client in the delivery of care                                                                           | .713                                |                               |                                                 |
| 8) Respects the values of individuals                                                                                                 | .754                                |                               |                                                 |
| 9) Respects the cultural practices of individuals                                                                                     | .681                                |                               |                                                 |
| 10) Respects the individual's religious beliefs and practices, as well as their spirituality needs                                    | .706                                |                               |                                                 |
| 13) Shows caring attributes towards clients and families                                                                              | .558                                |                               |                                                 |
| 2. Management of care                                                                                                                 |                                     | .916                          | .938                                            |
| 11) Communicates effectively and timely using appropriate verbal skills with clients and families                                     | .524                                |                               |                                                 |
| 12) Communicates effectively using appropriate non-verbal skills with clients and families                                            | .588                                |                               |                                                 |
| 14) Performs comprehensive and systematic assessment                                                                                  | .761                                |                               |                                                 |
| 15) Formulates plans of care with the healthcare team, client and families                                                            | .676                                |                               |                                                 |
| 16) Implements the holistic plan of care safely and timely                                                                            | .775                                |                               |                                                 |
| 17) Evaluates and modifies plan of care with appropriate documentation                                                                | .704                                |                               |                                                 |
| 18) Applies critical thinking skills and makes appropriate clinical decisions                                                         | .708                                |                               |                                                 |
| 22) Conducts educational needs assessment                                                                                             | .781                                |                               |                                                 |
| 23) Empowers aspects of care to clients, families and carers                                                                          | .645                                |                               |                                                 |
| 24) Provides information using available resources                                                                                    | .731                                |                               |                                                 |

|                                                                                      |             |             |
|--------------------------------------------------------------------------------------|-------------|-------------|
| 3. Leadership & nursing management                                                   | .909        | .927        |
| 25) Demonstrates collaborative practice with healthcare professionals                | .594        |             |
| 26) Establishes rapport and interacts with team members in a supportive manner       | .621        |             |
| 27) Demonstrates effective delegation to team members                                | .563        |             |
| 28) Follows up on the work delegated                                                 | .702        |             |
| 29) Utilises materials efficiently and minimises wastage                             | .641        |             |
| 30) Works with RN to make efficient use of manpower resources                        | .709        |             |
| 31) Manages time in an effective manner                                              | .725        |             |
| 21) Provides a safe care environment for clients                                     | .618        |             |
| 32) Demonstrates knowledge of occupational health and safety policies and procedures | .662        |             |
| 33) Prioritises the tasks based on the urgency of the clinical situation             | .723        |             |
| 34) Manages workloads effectively by seeking help when necessary                     | .652        |             |
| 4. Professional development                                                          | .789        | .881        |
| 35) Reflects on own nursing practice                                                 | .543        |             |
| 36) Responds positively to constructive feedback                                     | .664        |             |
| 37) Takes steps to address areas of improvement in skills and knowledge              | .673        |             |
| 38) Demonstrates basic knowledge on evidence-based practice                          | .519        |             |
| <b>Total score</b>                                                                   | <b>.965</b> | <b>.979</b> |
